# Supplementary material for: Construction of a fluorescence turn-on probe for highly discriminating detection of cysteine
Source: Royal Society of Chemistry journal article supplement (doi:10.1039/c4ra11167b), 2014-01-01
Supplement: c4ra11167b1.pdf [file c4ra11167b1.pdf]

## Supporting Information

### Construction of a fluorescence turn-on probe for highly discriminating detection of cysteine

Feiyi Wang, Jiancai An, Lili Zhang, Chunchang Zhao\*

Key Laboratory for Advanced Materials and Institute of Fine Chemicals, East China

University of Science & Technology, Shanghai 200237, P. R. China

E-mail: zhaocchang@ecust.edu.cn

#### Table of contents

|                                                                                                          |       |
|----------------------------------------------------------------------------------------------------------|-------|
| 1. Materials and instruments .....                                                                       | S2    |
| 2. The fluorescence color changes.....                                                                   | S3    |
| 3. Pseudo first-order kinetic plots.....                                                                 | S4    |
| 4. HRMS and HPLC spectra of the products of <b>HO-BODIPY-Cl</b> with Cys,Hcy and GSH.....                | S5    |
| 5. The absorption and emission spectra of <b>HO-BODIPY-Cl</b> in the presence of N-acetyl-cysteine. .... | S6    |
| 6. Time dependent fluorescence changes of <b>HO-BODIPY-Cl</b> upon incubation with CGL.....              | S7    |
| 7. NMR and HRMS Spectra.....                                                                             | S8-S9 |

## 1. Materials and instruments

All chemical reagents and solvents for synthesis were purchased from commercial suppliers and were used without further purification.  $^1\text{H}$  NMR and  $^{13}\text{C}$  NMR spectra were recorded on a Bruker AV-400 spectrometer with chemical shifts reported in ppm at room temperature. Mass spectra were measured on a HP 1100 LC-MS spectrometer. UV-vis absorption spectra were recorded on a Varian Cary 100 spectrophotometer. Fluorescence spectra were measured with a Varian Cary Eclipse Fluorescence spectrophotometer. Spectral-grade solvents were used for measurements of UV-vis absorption and fluorescence. For absorption or fluorescence measurements, compounds were dissolved in  $\text{CH}_3\text{CN}$  to obtain stock solutions (5.0 mM). These stock solutions were diluted with aqueous solutions to the desired

**Cells culture and imaging.** HeLa cells were cultured in Roswell Park Memorial Institute 1640 medium (RPMI-1640) supplemented with 10% fetal bovine serum (FBS) at 37 °C in a humidified atmosphere of 5/95  $\text{CO}_2$ /air incubator for 24 h. For fluorescence imaging, cells were incubated in glass bottom dishes for 24 h.

In a control experiment, the cells were treated with 500  $\mu\text{M}$  N-methylmaleimide in culture media for 20 min in incubator at 37 °C, and then washed with D-Hanks. The cells were further incubated with 10  $\mu\text{M}$  **HO-BODIPY-Cl** for 20 min, washed with D-Hanks. For imaging of Cys, HeLa cells pretreated with 500  $\mu\text{M}$  N-methylmaleimide for 20 min, further incubated with 100  $\mu\text{M}$  Cys for 20 min, then loaded with **HO-BODIPY-Cl** (10  $\mu\text{M}$ ) for 20 min. The samples were excited with 561 nm.

## 2. The fluorescence color changes.

a

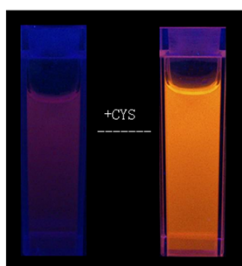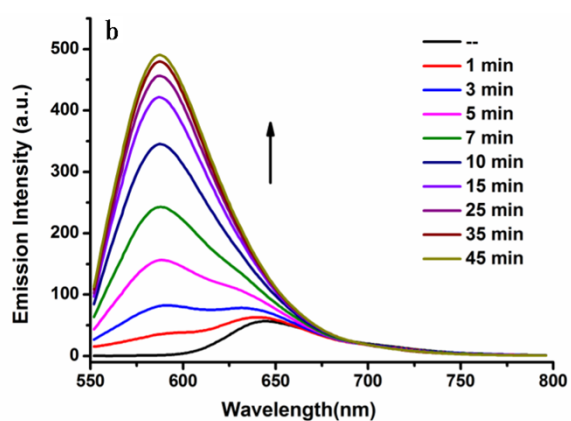

**Figure S1.** (a) The fluorescence color changes of **HO-BODIPY-Cl** in the absence and presence of Cys. (b) Time-dependent fluorescence spectra changes of **HO-BODIPY-Cl** (5 μM) in the presence of 5 mM Cys in acetonitrile / HEPES buffer (1:1, v/v , 20 mM, pH 7.4) at 37°C.

### 3. Pseudo first-order kinetic plots.

Time-course kinetic measurements of **HO-BODIPY-Cl** with Cys were performed using the fluorescence intensity at 587 nm. Data were collected under pseudo-first-order conditions. Spectra were acquired in acetonitrile / HEPES buffer (1:1, v/v, 20 mM, pH 7.4) at 37 °C. The pseudo-first-order rate constant for the reaction was determined by fitting the fluorescence intensity changes of the samples to the pseudo first-order equation:  $\text{Ln}((I_{\text{max}}-I_t)/I_{\text{max}})) = -k_{\text{obs}} t$

Where  $I_t$  and  $I_{\text{max}}$  represent the fluorescence intensities at times  $t$  and the maximum value obtained after the reaction was complete.  $k_{\text{obs}}$  is the observed rate constant.

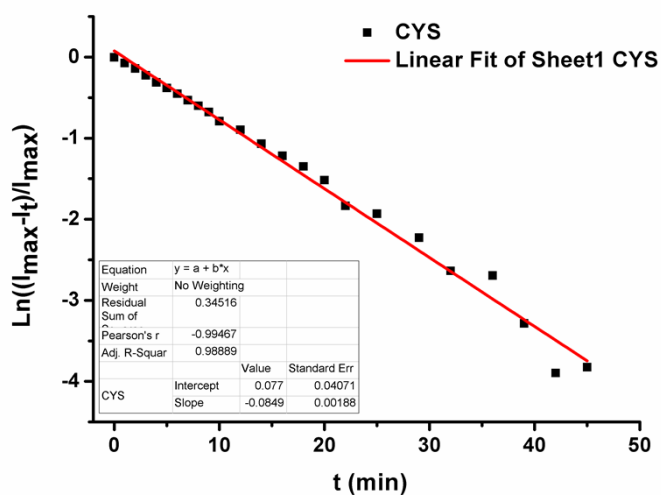

**Figure S2.** Pseudo first-order kinetic plots of the reaction of **HO-BODIPY-Cl** (5  $\mu\text{M}$ ) with Cys (5 mM).

#### 4. HPLC and MS spectra of the products of HO-BODIPY-Cl with Cys, Hcy and GSH.

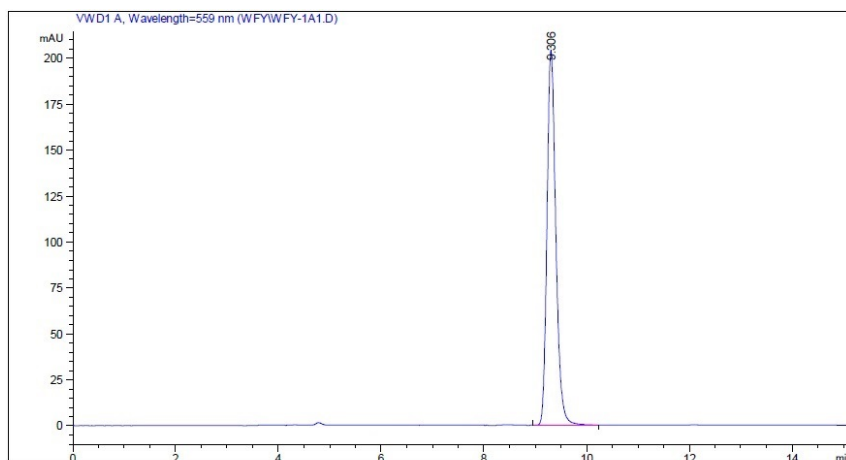

##### Elemental Composition Report

Page 1

##### Single Mass Analysis

Tolerance = 30.0 mDa / DBE: min = -1.5, max = 100.0

Element prediction: Off

Number of isotope peaks used for i-FIT = 2

Monoisotopic Mass, Even Electron Ions

337 formula(e) evaluated with 35 results within limits (up to 1 closest results for each mass)

Elements Used:

C: 0-20 H: 0-20 N: 0-5 O: 0-4 Cl: 0-1 F: 0-2 B: 0-1

ZHAO-CC

ECUST Institute of Fine Chem

29-Sep-2013

16:10:03

1: TOF MS ES-

1.27e+004

ZCC-WFY-008 183 (1.286) Cm (182:188)

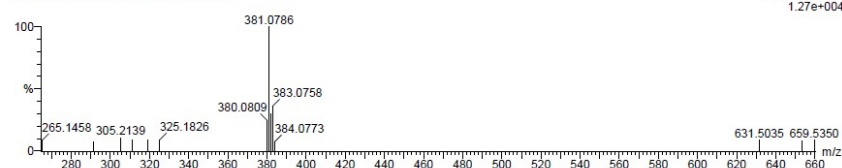

Minimum: -1.5  
Maximum: 100.0

| Mass     | Calc. Mass | mDa | PFM | DBE  | i-FIT | i-FIT (Norm) | Formula              |
|----------|------------|-----|-----|------|-------|--------------|----------------------|
| 381.0786 | 381.0778   | 0.8 | 2.1 | 14.5 | 24.1  | 0.0          | C20 H13 N2 O Cl F2 B |

a

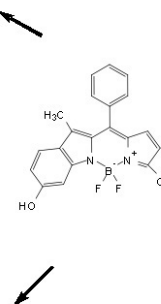

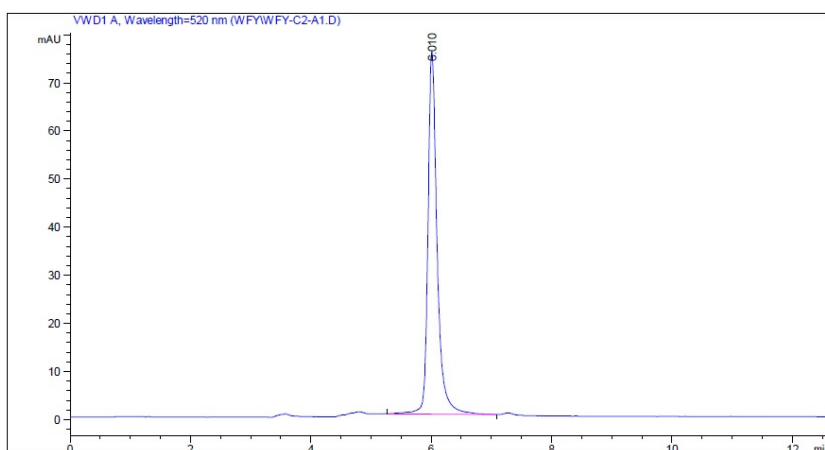

**b**

# Elemental Composition Report

Figure 1

## Single Mass Analysis

Tolerance = 30.0 mDa / DBE: min = -1.5, max = 100.0

Element prediction: Off

Number of isotope peaks used for i-FIT = 2

Monoisotopic Mass, Even Electron Ions

200 formula(e) evaluated with 1 results within limits (all results (up to 1000) for each mass)

Elements Used:

C: 0-23 H: 0-150 11B: 0-1 N: 0-3 O: 0-3 F: 0-2 S: 0-1

CC-ZHAO

ECUST Institute of Fine Chem

06-Jul-2014

23:52:54

2: TOF MS ES-

1.45e+003

ZC-WFY-005 30 (1.032) Cm (22:31)

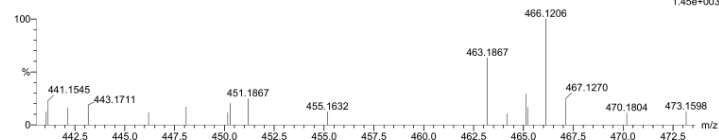

Minimum:

Maximum:

30.0

50.0

-1.5

100.0

Mass

Calc. Mass

mDa

PPM

DBE

i-FIT

i-FIT (Norm)

Formula

466.1206

466.1208

-0.2

-0.4

15.5

9.5

0.0

C23 H19 11B N3 O3 F2 S

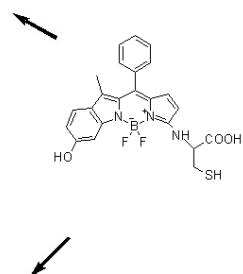

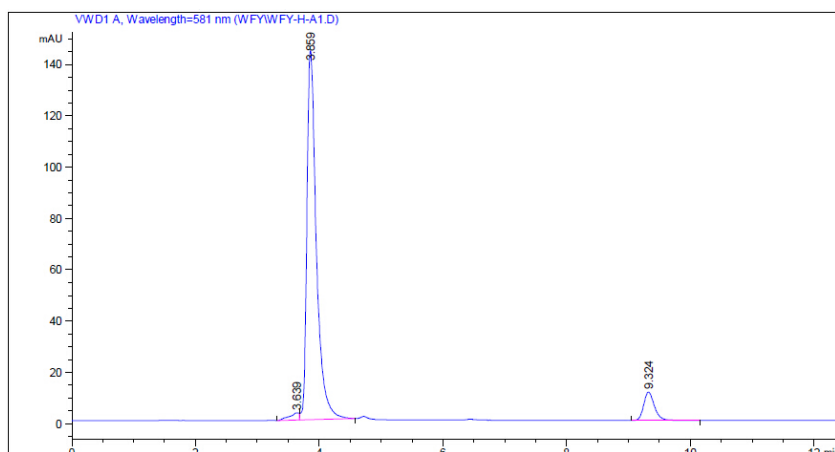

# Elemental Composition Report

## Single Mass Analysis

Tolerance = 30.0 mDa / DBE: min = -1.5, max = 100.0

Element prediction: Off

Number of isotope peaks used for i-FIT = 2

Monoisotopic Mass, Even Electron Ions

279 formula(e) evaluated with 37 results within limits (up to 1 best isotopic matches for each mass)

Elements Used:

C: 0-31 H: 0-33 11B: 0-1 N: 0-3 O: 0-3 F: 0-2 S: 0-1

CC-2H4O

ECUST Institute of Fine Chem

ZC-WFY-007-9.29 (0.989) Cm (9.29)

21:22:37  
1: TOF MS ES+  
2.97e+002

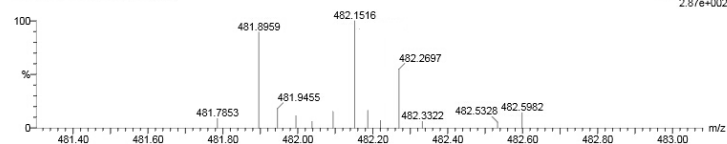

Minimum:

Maximum: 30.0 50.0 -1.5 100.0

Mass Calc. Mass mDa PPM DBE i-FIT i-FIT (Norm) Formula

482.1516 482.1521 -0.5 -1.0 14.5 65.5 0.0 C24 H23 11B N3 O3 F2 S

C

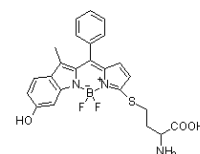

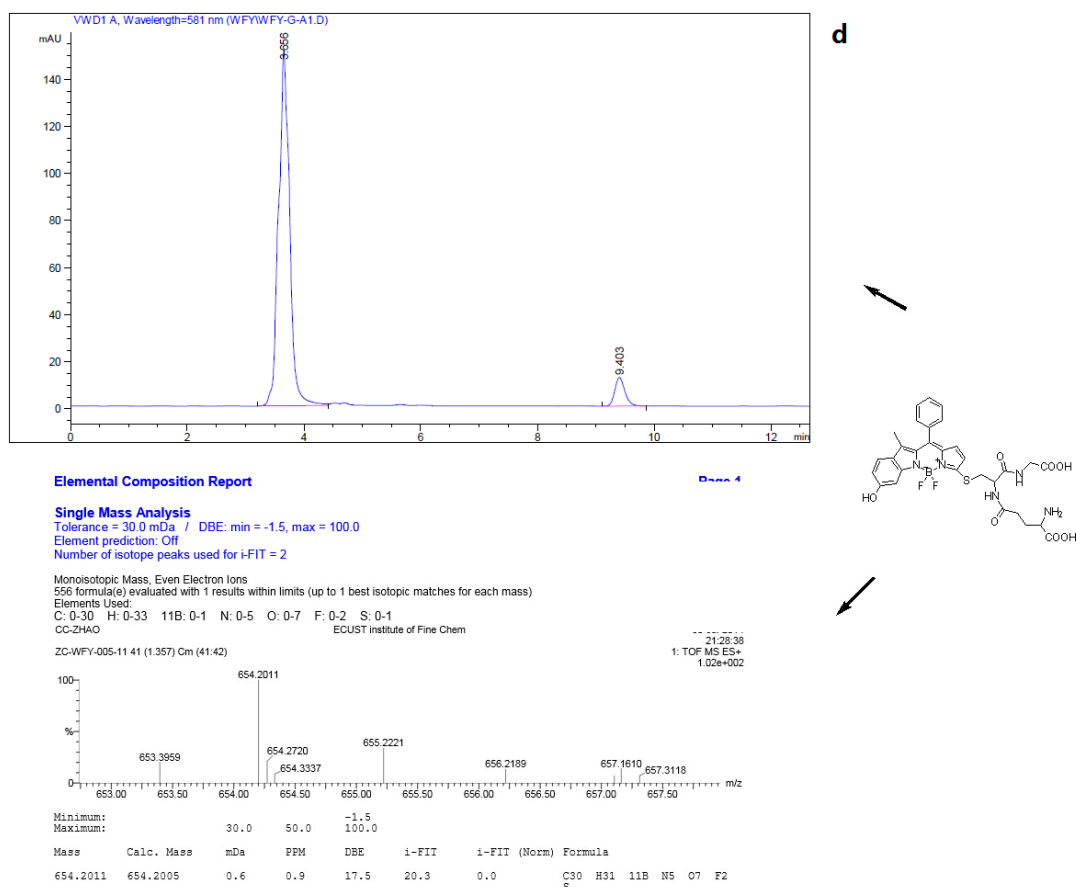

Figure S3. HRMS and HPLC spectra of (a) **HO-BODIPY-Cl**, (b) **HO-BODIPY-Cl** + Cys, (c) **HO-BODIPY-Cl** + Hcy and (d) **HO-BODIPY-Cl** + GSH.

**5. The absorption and emission spectra of HO-BODIPY-Cl in the presence of N-acetyl-cysteine.**

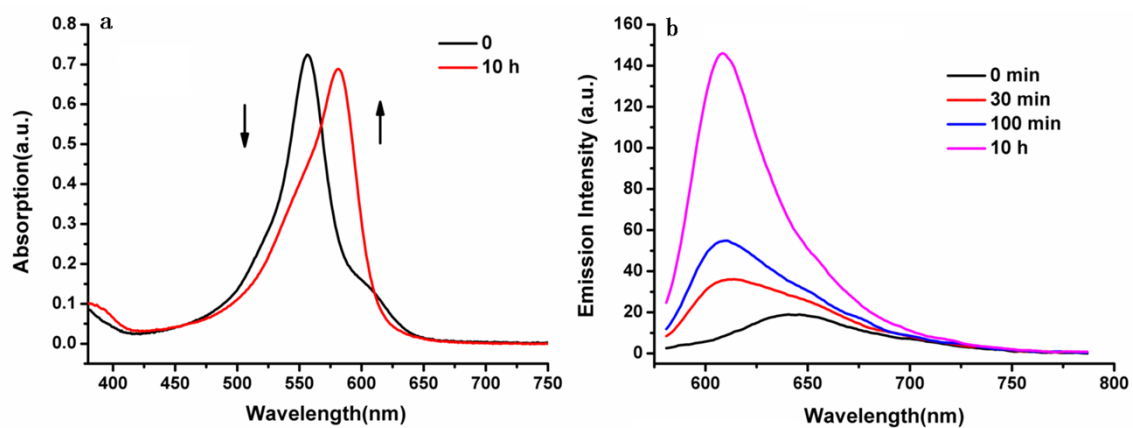

**Figure S4.** Changes of absorption and emission spectra of HO-BODIPY-Cl (5 μM) before and after the addition of N-acetyl-cysteine in acetonitrile/HEPES buffer(1:1, v/v, 20 mM, pH 7.4) at 37 °C ( $\lambda_{ex}$  = 557 nm).

## 6. Time dependent fluorescence changes of HO-BODIPY-Cl upon incubation with CGL.

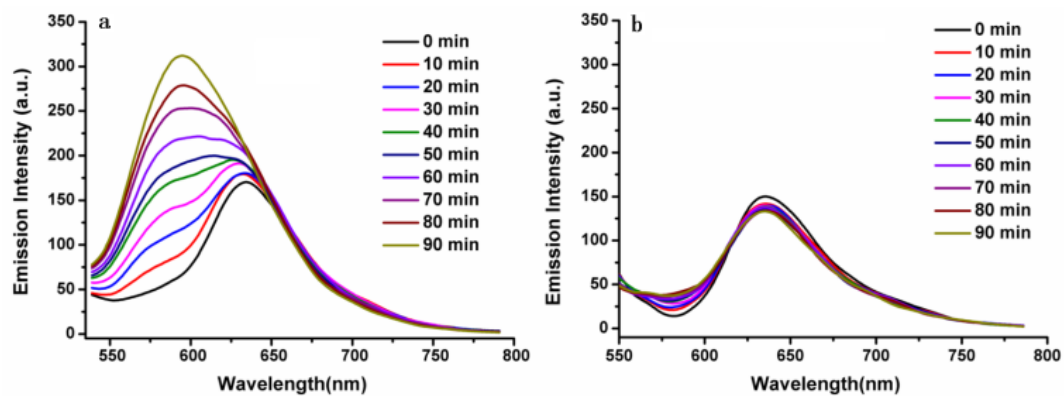

Figure S5. Time dependent fluorescence changes of **HO-BODIPY-Cl** (10 μM) upon incubation with CGL and its substrate cystathionine (3mM), (a) in the presence and (b) absence of PAG (CGL inhibitor).

## 7. NMR and HRMS Spectra

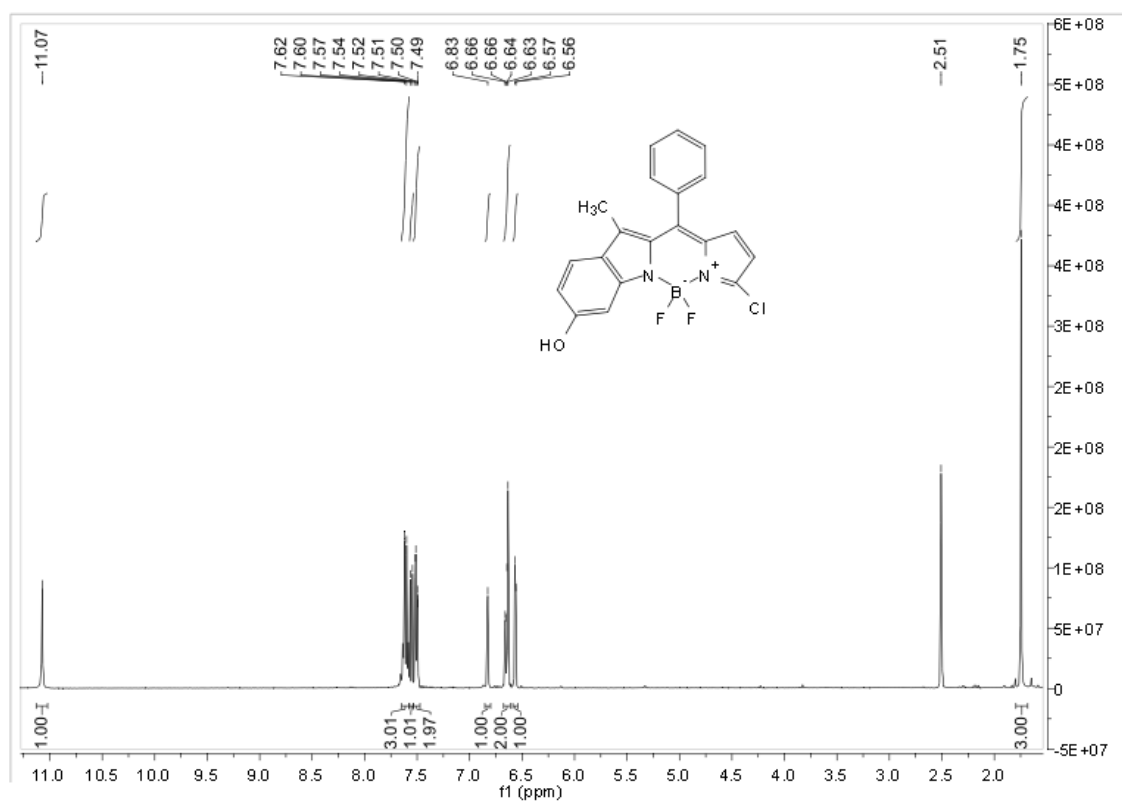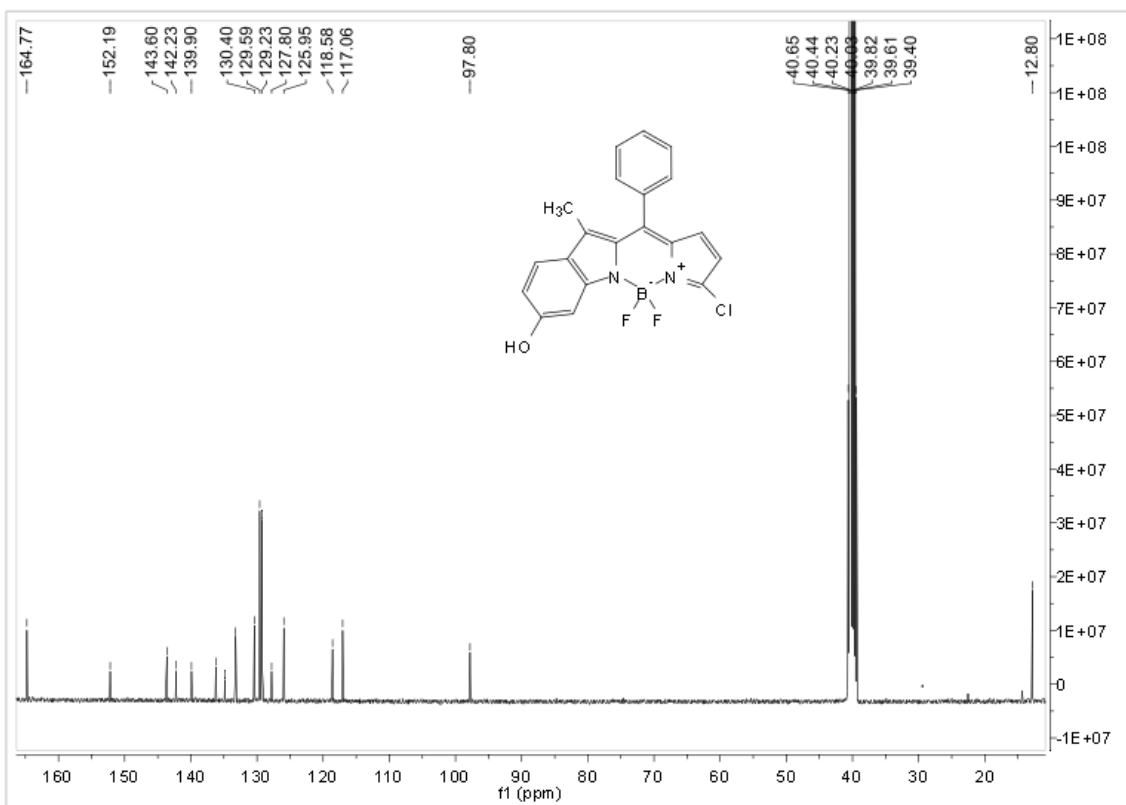

## Elemental Composition Report

Page 1

### Single Mass Analysis

Tolerance = 30.0 mDa / DBE: min = -1.5, max = 100.0

Element prediction: Off

Number of isotope peaks used for i-FIT = 2

Monoisotopic Mass, Even Electron Ions

337 formula(e) evaluated with 35 results within limits (up to 1 closest results for each mass)

Elements Used:

C: 0-20 H: 0-20 N: 0-5 O: 0-4 Cl: 0-1 F: 0-2 B: 0-1

ZHAO-CC

ECUST institute of Fine Chem

ZCC-WFY-008 183 (1.286) Cm (182:188)

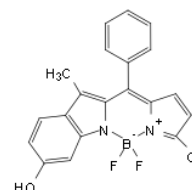

29-Sep-2013  
16:10:03  
1: TOF MS ES-  
1.27e+004

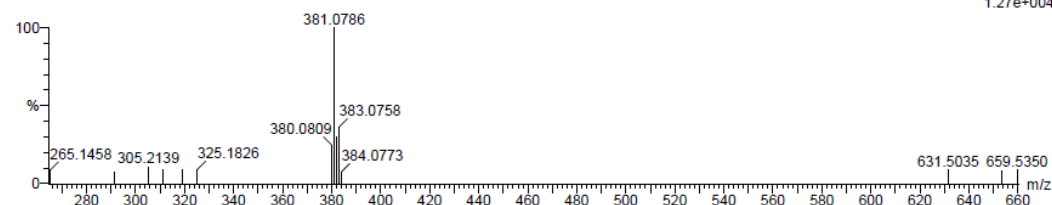

Minimum: -1.5  
Maximum: 30.0 50.0 100.0

| Mass     | Calc. Mass | mDa | PPM | DBE  | i-FIT | i-FIT (Norm) | Formula              |
|----------|------------|-----|-----|------|-------|--------------|----------------------|
| 381.0786 | 381.0778   | 0.8 | 2.1 | 14.5 | 24.1  | 0.0          | C20 H13 N2 O Cl F2 B |
